# Supplementary material for: Effects of Calcium and Manganese on Sporulation of Bacillus Species Involved in Food Poisoning and Spoilage
Source: PubMed Central journal article supplement (PMC6517867; doi:10.3390/foods8040119), 2019-04-07
Supplement: foods-08-00119-s001.pdf [file foods-08-00119-s001.pdf]

**Table S1.** Statistical comparison of sporulation of *B. licheniformis* and *B. cereus* influenced by calcium and manganese supplementation concentrations.

| Calcium<br>(mM) | Manganese<br>(mM) | Viable spore count (Log CFU/mL) <sup>1</sup> |                              |
|-----------------|-------------------|----------------------------------------------|------------------------------|
|                 |                   | <i>B. licheniformis</i>                      | <i>B. cereus</i>             |
| 0.00            | 0.00              | 8.89 ± 0.09 <sup>HJKLM</sup>                 | 8.22 ± 0.04 <sup>K,*</sup>   |
|                 | 0.10              | 8.95 ± 0.04 <sup>FGHIJ</sup>                 | 8.80 ± 0.07 <sup>I</sup>     |
|                 | 0.25              | 8.85 ± 0.08 <sup>KL</sup>                    | 8.84 ± 0.10 <sup>GHI</sup>   |
|                 | 0.50              | 8.94 ± 0.10 <sup>FGHIJ</sup>                 | 9.02 ± 0.07 <sup>BCD</sup>   |
| 0.25            | 0.00              | 8.83 ± 0.06 <sup>LM</sup>                    | 8.90 ± 0.05 <sup>EFGH</sup>  |
|                 | 0.10              | 8.75 ± 0.04 <sup>M,*</sup>                   | 8.97 ± 0.09 <sup>CDEF</sup>  |
|                 | 0.25              | 8.88 ± 0.06 <sup>IJKL</sup>                  | 8.93 ± 0.03 <sup>DEFG</sup>  |
|                 | 0.50              | 8.96 ± 0.02 <sup>FGH</sup>                   | 8.89 ± 0.05 <sup>EFGHI</sup> |
| 0.50            | 0.00              | 9.18 ± 0.01 <sup>AB</sup>                    | 9.12 ± 0.04 <sup>A,+</sup>   |
|                 | 0.10              | 9.07 ± 0.04 <sup>CDE</sup>                   | 8.65 ± 0.13 <sup>J</sup>     |
|                 | 0.25              | 8.86 ± 0.04 <sup>L</sup>                     | 8.65 ± 0.12 <sup>J</sup>     |
|                 | 0.50              | 8.96 ± 0.08 <sup>FGHIJ</sup>                 | 8.89 ± 0.09 <sup>EFGHI</sup> |
| 1.00            | 0.00              | 9.24 ± 0.06 <sup>A,+</sup>                   | 8.69 ± 0.09 <sup>J</sup>     |
|                 | 0.10              | 9.02 ± 0.03 <sup>DEF</sup>                   | 8.98 ± 0.06 <sup>CDEF</sup>  |
|                 | 0.25              | 8.94 ± 0.03 <sup>FGHIJK</sup>                | 8.99 ± 0.12 <sup>CDE</sup>   |
|                 | 0.50              | 8.88 ± 0.08 <sup>JKL</sup>                   | 8.89 ± 0.06 <sup>FGHI</sup>  |
| 2.00            | 0.00              | 9.15 ± 0.10 <sup>BC</sup>                    | 8.69 ± 0.14 <sup>J</sup>     |
|                 | 0.10              | 9.07 ± 0.10 <sup>CD</sup>                    | 8.81 ± 0.06 <sup>HI</sup>    |
|                 | 0.25              | 8.98 ± 0.04 <sup>EFG</sup>                   | 9.05 ± 0.06 <sup>ABC</sup>   |
|                 | 0.50              | 8.91 ± 0.07 <sup>GHIJKL</sup>                | 9.11 ± 0.10 <sup>AB</sup>    |
| Average         |                   | 8.97 ± 0.12                                  | 8.85 ± 0.21                  |

<sup>1</sup> Mean ± standard deviation calculated from triplicates; <sup>A-M</sup> mean values in the same column that are followed by different letters are significantly different ( $p < 0.05$ ); \* the lowest viable spore count obtained; + the highest viable spore count obtained.

**Table S2.** Statistical comparison of sporulation of *B. subtilis* and *B. coagulans* influenced by calcium and manganese supplementation concentrations.

| Calcium<br>(mM) | Manganese<br>(mM) | Viable spore count (Log CFU/mL) <sup>1</sup> |                               |
|-----------------|-------------------|----------------------------------------------|-------------------------------|
|                 |                   | <i>B. subtilis</i>                           | <i>B. coagulans</i>           |
| 0.00            | 0.00              | 9.97 ± 0.05 <sup>A,+</sup>                   | 10.04 ± 0.02 <sup>A,+</sup>   |
|                 | 0.10              | 9.78 ± 0.04 <sup>FG</sup>                    | 9.86 ± 0.01 <sup>CDEF</sup>   |
|                 | 0.25              | 9.87 ± 0.05 <sup>BCD</sup>                   | 9.78 ± 0.05 <sup>GHIJ</sup>   |
|                 | 0.50              | 9.89 ± 0.04 <sup>BC</sup>                    | 9.91 ± 0.03 <sup>CD</sup>     |
| 0.25            | 0.00              | 9.89 ± 0.04 <sup>BC</sup>                    | 9.82 ± 0.06 <sup>EFGHI</sup>  |
|                 | 0.10              | 9.88 ± 0.03 <sup>BC</sup>                    | 9.91 ± 0.04 <sup>BC</sup>     |
|                 | 0.25              | 9.87 ± 0.03 <sup>CD</sup>                    | 9.86 ± 0.10 <sup>CDEFGH</sup> |
|                 | 0.50              | 9.92 ± 0.04 <sup>AB</sup>                    | 9.90 ± 0.06 <sup>CD</sup>     |
| 0.50            | 0.00              | 9.76 ± 0.04 <sup>G</sup>                     | 9.79 ± 0.05 <sup>HIJ</sup>    |
|                 | 0.10              | 9.80 ± 0.03 <sup>EFG</sup>                   | 9.76 ± 0.03 <sup>IJ</sup>     |
|                 | 0.25              | 9.88 ± 0.04 <sup>BC</sup>                    | 9.76 ± 0.05 <sup>IJ</sup>     |
|                 | 0.50              | 9.84 ± 0.02 <sup>CDE</sup>                   | 9.79 ± 0.01 <sup>FGHIJ</sup>  |
| 1.00            | 0.00              | 9.80 ± 0.03 <sup>EFG</sup>                   | 9.80 ± 0.05 <sup>EFGHIJ</sup> |
|                 | 0.10              | 9.83 ± 0.03 <sup>DEF</sup>                   | 9.87 ± 0.02 <sup>CDE</sup>    |
|                 | 0.25              | 9.83 ± 0.05 <sup>DEF</sup>                   | 9.87 ± 0.02 <sup>CDEF</sup>   |
|                 | 0.50              | 9.90 ± 0.05 <sup>BC</sup>                    | 9.85 ± 0.05 <sup>DEF</sup>    |
| 2.00            | 0.00              | 9.82 ± 0.05 <sup>DEF</sup>                   | 9.81 ± 0.04 <sup>EFGHI</sup>  |
|                 | 0.10              | 9.82 ± 0.05 <sup>EF</sup>                    | 9.74 ± 0.07 <sup>I,*</sup>    |
|                 | 0.25              | 9.70 ± 0.03 <sup>H,*</sup>                   | 9.86 ± 0.06 <sup>CDEF</sup>   |
|                 | 0.50              | 9.92 ± 0.03 <sup>AB</sup>                    | 9.97 ± 0.04 <sup>B</sup>      |
| Average         |                   | 9.85 ± 0.06                                  | 9.85 ± 0.07                   |

<sup>1</sup> Mean ± standard deviation calculated from triplicates; <sup>A-J</sup> mean values in the same column that are followed by different letters are significantly different ( $p < 0.05$ ); \* the lowest viable spore count obtained; + the highest viable spore count obtained.
